# Supplementary material
Source: publisher site journal article supplement (https://www.dovepress.com/article/391781)
Supplement: Supplementary file 1 [file get_supplementary_file.php]

**Supplementary Table 1: Variables to be analyzed and Variables with missing**

| Types | Variables |
| --- | --- |
| Demographics | Age, Sex, BMI, SBP, DBP, Smoker, Drinking, family history of diabetes, family history of hypertension |
| Medical history | Diabetic duration, presence of hypertension, hypertension duration, peripheral vascular disease, peripheral macrovascular disease, hyperlipidemia, duration of  hyperlipidemia, peripheral neuropathy |
| Treatment history | Antidiabetic drugs (oral antidiabetic agents, oral antidiabetic agents & insulin, insulin); Antihypertensive drugs (angiotensin receptor blockers), lower-lipid agent, aspirin |
| Related to plasma glucose | FPG, HbA1c, FCP, FINS |
| Laboratory parameters | WBC, RBC, Hb, HCT, RDW-CV, RDW-SD, PLT, AST, ASL, Alb, γ-GGT, TG, LDL-C, HDL-C, UA, TC, DBIL, TBIL, IBIL, Scr, TSH |
| Parameters with missing  Values>40% | 30' C peptide, 60' C peptide, 120' C peptide, 180' C peptide, Insulin30', Insulin 60', Insulin 120', Insulin 180', T3, T4, fT3, fT4, PCT, CRP, BMG, Cys-C, C1q, ESR, PT, APTT, D-Dimer, FIB |

*Notes:* SBP, systolic blood pressure; DBP, diastolic blood pressure; BMI, Body Mass Index; FPG, fasting blood glucose; HbA1c, glycated hemoglobin; FCP, fasting C-peptide; FINS, fasting insulin; WBC, white blood cells; RBC, red blood cell; Hb, hemoglobin; HCT, hematocrit; RDW-CV, Variation coefficient of red blood cell distribution width; RDW-SD, Standard deviation of red blood cell distribution width; PLT, platelet; AST, aspartate aminotransferase; ALT, alanine aminotransferase; Alb, serum albumin; γ-GGT, γ-glutamyl transpeptidase; TG, triglycerides; LDL-C, low-density lipoprotein cholesterol; HDL-C, high- density lipoprotein cholesterol; UA, uric acid; TC, total cholesterol; DBIL, direct bilirubin; TBIL, total serum bilirubin; IBIL, indirect bilirubin; SCr, serum creatinine; TSH, thyroid stimulating hormone; T3, triiodothyronine; T4, thyroxine; FT3, serum free triiodothyronine; FT4, free thyroxine; PCT, procalcitonin; CRP, C-reactive protein; BMG, β2-Microgbulobulin; Cys-C, cystatin C;C1q, Complement C1q; ESR, erythrocyte sedimentation rate; PT, prothrombin time; APTT, activated partial thromboplatin time; FIB, fibrinogen.

**Supplementary Table 2:**

Univariate and multivariate logistic regression analysis for independent factors of DKD

| Risk factors | Univariate | | Multivariate | |
| --- | --- | --- | --- | --- |
| Crude OR (95%CI) | P-value | Adjusted OR (95%CI) | P-value |
| Age (year) | 1.022(1.008, 1.036) | 0.002 | 1.014(0.991, 1.038) | 0.235 |
| BMI (kg/m2) | 1.007(0.993, 1.021) | 0.327 |  |  |
| Smoker (yes) | 1.362(1.011, 1.834) | 0.042 | 1.384(0.902, 2.123) | 0.137 |
| Family history | 1.059(0.912, 1.231) | 0.452 |  |  |
| Duration of diabetes(year) | 1.066(1.041, 1.091) | <0.001 | 1.032(0.994, 1.070) | 0.099 |
| Presence of hypertension | 4.079(2.981, 5.580) | <0.001 | 1.454(0.735, 2.877) | 0.283 |
| Duration of hypertension (year) | 1.092(1.065, 1.119) | <0.001 | 1.022(0.982, 1.063) | 0.285 |
| SBP (mmHg) | 1.043(1.030, 1.055) | <0.001 | 1.022(1.004, 1.041) | 0.019 |
| DBP (mmHg) | 1.038(1.023, 1.054) | <0.001 | 1.009(0.984, 1.034) | 0.493 |
| Peripheral neuropathy disease | 0.768(0.562, 1.048) | 0.096 |  |  |
| Peripheral vascular disease | 1.827(1.310, 2.548) | <0.001 | 1.661 (1.057, 2.609) | 0.028 |
| Antidiabetic agents (Insulin) | 3.280(2.288, 4.504) | <0.001 | 2.942(1.885, 4.592) | <0.001 |
| Antihypertension agents | 2.178(1.818, 2.610) | <0.001 | 1.638(1.129, 2.375) | 0.009 |
| Low-lipid agents (%) | 2.422(1.498, 3.916) | <0.001 | 1.935(0.967, 3.874) | 0.062 |
| Aspirin (%) | 2.631(1.474, 4.696) | 0.001 | 1.638(1.129, 2.375) | 0.009 |
| FPG (mmol/L) | 1.139(1.088, 1.192) | <0.001 | 1.232(1.138, 1.334) | <0.001 |
| HbA1c (%) | 1.125(1.044, 1.213) | 0.002 | 1.056(0.920, 1.212) | 0.438 |
| FCP (ng/ml) | 1.412(1.215, 1.641) | <0.001 | 1.558(1.244, 1.950) | <0.001 |
| FINS (μIU/ml) | 1.031(1.013, 1.050) | 0.001 | 0.994(0.973, 1.016) | 0.611 |
| TSH (μIU/ml) | 1.225(1.133, 1.325) | <0.001 | 1.212(1.100, 1.332) | <0.001 |
| WBC (×109/L) | 1.178 (1.089, 1.274) | <0.001 | 1.075(0.962, 1.200) | 0.201 |
| RBC (×109/L) | 0.960(0.827, 1.113) | 0.587 |  |  |
| Hb (g/L) | 0.989(0.980, 0.998) | 0.012 | 0.998(0.961, 1.037) | 0.920 |
| HCT (%) | 0.012(0.001, 0.273) | 0.005 |  |  |
| PLT (×109/L) | 1.006(1.004, 1.009) | <0.001 | 1.004(1.000, 1.007) | 0.032 |
| γ-GGT (IU/L) | 1.005(1.001, 1.008) | 0.016 | 1.002(0.997, 1.007) | 0.491 |
| Alb (g/L) | 0.929(0.897, 0.962) | <0.001 | 0.942(0.896, 0.990) | 0.019 |
| TG (mmol/L) | 1.0052(0.985, 1.123) | 0.128 |  |  |
| LDL (mmol/L) | 1.552(1.271, 1.894) | <0.001 | 2.816(1.454, 3.288) | <0.001 |
| UA (μmol/L) | 1.005(1.003, 1.006) | <0.001 | 1.005(1.003, 1.008) | <0.001 |
| TC (mmol/L) | 1.218(1.075, 1.381) | 0.002 | 0.802(0.607, 1.060) | 0.121 |
| TBIL (μmol/L) | 0.957(0.928, 0.985) | 0.003 | 0.984(0.910, 1.064) | 0.684 |
| DBIL (μmol/L) | 0.790(0.679, 0.920) | 0.002 | 1.989(0.684, 1.430) | 0.953 |
| IBIL (μmol/L) | 0.959(0.926, 0.993) | 0.017 | 1.004(0.948, 1.063) | 0.897 |

**Supplementary Table 3:**

| **Variables** | **Category** | **value** | **Variables** | **Category** | **value** |
| --- | --- | --- | --- | --- | --- |
| Duration of DM (years) | ≤10 | 0 | PLT (×109/L) | ≤187.5 | 0 |
|  | ＞10 | 1 |  | >187.5 | 1 |
| HbA1c (%) | ≤8.70 | 0 | UA (μmol/L) | ≤385.48 | 0 |
|  | >8.70 | 1 |  | >385.48 | 1 |
| C-peptide (ng/ml) | ≤1.41 | 0 | TSH (μIU/ml) | ≤2.10 | 0 |
|  | >1.41 | 1 |  | >2.10 | 1 |
| FPG (mmol/L) | ≤10.41 | 0 | LDL (mmol/L) | ≤3.40 | 0 |
|  | >10.41 | 1 |  | >3.40 | 1 |
| SBP (mmHg) | ≤130 | 0 | γ-GGT (IU/L) | ≤23.43 | 0 |

Variables transformation according to the receiver operator characteristic curve
